# Supplementary material
Source: HighWire-hosted journal article supplement (https://tech.snmjournals.org/highwire/filestream/8639/field_highwire_adjunct_files/0/124727_Supplemental_Data.pdf)
Supplement: 124727_Supplemental_Data.pdf [file 124727_Supplemental_Data.pdf]

Supplemental Appendix 1

**Ramped and Standard Bruce Protocols**

| <b>Duration</b> | <b>Ramped Bruce Stage</b> | <b>Ramped Bruce Speed (mph)</b> | <b>Ramped Bruce Grade (%)</b> | <b>Standard Bruce Stage</b> | <b>Standard Bruce Speed (mph)</b> | <b>Standard Bruce Grade (%)</b> | <b>METs achieved</b> |
|-----------------|---------------------------|---------------------------------|-------------------------------|-----------------------------|-----------------------------------|---------------------------------|----------------------|
| <b>0:00 **</b>  | <b>1</b>                  | <b>1.7</b>                      | <b>0</b>                      | <b>1</b>                    | <b>1.7</b>                        | <b>10.0</b>                     | <b>1.8</b>           |
| 0:20            | 2                         | 1.7                             | 1.3                           | 1                           | 1.7                               | 10.0                            | 1.9                  |
| 0:40            | 3                         | 1.7                             | 2.5                           | 1                           | 1.7                               | 10.0                            | 2                    |
| 1:00            | 4                         | 1.7                             | 3.7                           | 1                           | 1.7                               | 10.0                            | 2.3                  |
| 1:20            | 5                         | 1.7                             | 5.0                           | 1                           | 1.7                               | 10.0                            | 2.6                  |
| 1:40            | 6                         | 1.7                             | 6.2                           | 1                           | 1.7                               | 10.0                            | 2.7                  |
| 2:00            | 7                         | 1.7                             | 7.5                           | 1                           | 1.7                               | 10.0                            | 2.7                  |
| 2:20            | 8                         | 1.7                             | 8.7                           | 1                           | 1.7                               | 10.0                            | 3.1                  |
| 2:40 *          | 9                         | 1.7                             | 10.0                          | 1                           | 1.7                               | 10.0                            | 3.4                  |
| <b>3:00**</b>   | <b>10</b>                 | <b>1.8</b>                      | <b>10.2</b>                   | <b>2</b>                    | <b>2.5</b>                        | <b>12.0</b>                     | <b>3.8</b>           |
| 3:20            | 11                        | 1.9                             | 10.2                          | 2                           | 2.5                               | 12.0                            | 4.2                  |
| 3:40            | 12                        | 2.0                             | 10.5                          | 2                           | 2.5                               | 12.0                            | 4.6                  |
| 4:00            | 13                        | 2.1                             | 10.7                          | 2                           | 2.5                               | 12.0                            | 4.8                  |
| 4:20            | 14                        | 2.2                             | 10.9                          | 2                           | 2.5                               | 12.0                            | 4.8                  |
| 4:40            | 15                        | 2.3                             | 11.2                          | 2                           | 2.5                               | 12.0                            | 5.3                  |
| 5:00            | 16                        | 2.4                             | 11.2                          | 2                           | 2.5                               | 12.0                            | 5.3                  |
| 5:20            | 17                        | 2.5                             | 11.6                          | 2                           | 2.5                               | 12.0                            | 5.5                  |
| 5:40 *          | 18                        | 2.5                             | 12.0                          | 2                           | 2.5                               | 12.0                            | 5.5                  |
| <b>6:00**</b>   | <b>19</b>                 | <b>2.6</b>                      | <b>12.2</b>                   | <b>3</b>                    | <b>3.4</b>                        | <b>14.0</b>                     | <b>6.1</b>           |
| 6:20            | 20                        | 2.7                             | 12.4                          | 3                           | 3.4                               | 14.0                            | 6.3                  |
| 6:40            | 21                        | 2.8                             | 12.7                          | 3                           | 3.4                               | 14.0                            | 6.5                  |
| 7:00            | 22                        | 2.9                             | 12.9                          | 3                           | 3.4                               | 14.0                            | 6.8                  |
| 7:20            | 23                        | 3.0                             | 13.1                          | 3                           | 3.4                               | 14.0                            | 7                    |
| 7:40            | 24                        | 3.1                             | 13.4                          | 3                           | 3.4                               | 14.0                            | 7                    |
| 8:00            | 25                        | 3.2                             | 13.6                          | 3                           | 3.4                               | 14.0                            | 7                    |
| 8:20            | 26                        | 3.3                             | 13.8                          | 3                           | 3.4                               | 14.0                            | 7.6                  |
| 8:40 *          | 27                        | 3.4                             | 14.0                          | 3                           | 3.4                               | 14.0                            | 7.6                  |
| <b>9:00**</b>   | <b>28</b>                 | <b>3.5</b>                      | <b>14.2</b>                   | <b>4</b>                    | <b>4.2</b>                        | <b>16.0</b>                     | <b>7.9</b>           |
| 9:20            | 29                        | 3.6                             | 14.4                          | 4                           | 4.2                               | 16.0                            | 8.1                  |
| 9:40            | 30                        | 3.7                             | 14.6                          | 4                           | 4.2                               | 16.0                            | 8.8                  |
| 10:00           | 31                        | 3.8                             | 14.8                          | 4                           | 4.2                               | 16.0                            | 9                    |
| 10:20           | 32                        | 3.9                             | 15.0                          | 4                           | 4.2                               | 16.0                            | 9.3                  |
| 10:40           | 33                        | 4.0                             | 15.2                          | 4                           | 4.2                               | 16.0                            | 9.6                  |

|                 | <b>Ramped<br/>Bruce</b> |                        |                      | <b>Standard<br/>Bruce</b> |                        |                      |             |
|-----------------|-------------------------|------------------------|----------------------|---------------------------|------------------------|----------------------|-------------|
| <b>Duration</b> | <b>Stage</b>            | <b>Speed<br/>(mph)</b> | <b>Grade<br/>(%)</b> | <b>Stage</b>              | <b>Speed<br/>(mph)</b> | <b>Grade<br/>(%)</b> | <b>METs</b> |
| 11:00           | 34                      | 4.1                    | 15.4                 | 4                         | 4.2                    | 16.0                 | 9.9         |
| 11:20           | 35                      | 4.2                    | 15.6                 | 4                         | 4.2                    | 16.0                 | 10.1        |
| 11:40 *         | 36                      | 4.2                    | 16.0                 | 4                         | 4.2                    | 16.0                 | 10.1        |
| <b>12:00 **</b> | <b>37</b>               | <b>4.3</b>             | <b>16.2</b>          | <b>5</b>                  | <b>5.0</b>             | <b>18.0</b>          | <b>10.4</b> |
| 12:20           | 38                      | 4.4                    | 16.4                 | 5                         | 5.0                    | 18.0                 | 10.4        |
| 12:40           | 39                      | 4.5                    | 16.6                 | 5                         | 5.0                    | 18.0                 | 11.1        |
| 13:00           | 40                      | 4.6                    | 16.8                 | 5                         | 5.0                    | 18.0                 | 11.1        |
| 13:20           | 41                      | 4.7                    | 17.0                 | 5                         | 5.0                    | 18.0                 | 11.4        |
| 13:40           | 42                      | 4.8                    | 17.2                 | 5                         | 5.0                    | 18.0                 | 11.7        |
| 14:00           | 43                      | 4.9                    | 17.4                 | 5                         | 5.0                    | 18.0                 | 12.5        |
| 14:20           | 44                      | 5.0                    | 17.6                 | 5                         | 5.0                    | 18.0                 | 12.8        |
| 14:40           | 45                      | 5.1                    | 18.0                 | 5                         | 5.0                    | 18.0                 | 12.8        |
| <b>15:00 **</b> | <b>46</b>               | <b>5.1</b>             | <b>18.0</b>          | <b>6</b>                  | <b>5.5</b>             | <b>20.0</b>          | <b>13.1</b> |

**\*Represents point at which ramped Bruce stage meets standard Bruce stage**

**\*\*Represents beginning of next three minute exercise stage**

## Supplemental Appendix 2

### Veterans Specific Activity Questionnaire (VSAQ)

Before beginning your treadmill test today, we need to estimate what your usual limits are during daily activities. The following is a list of activities that increase in difficulty as you read down the page. Think carefully then underline the first activity that if you performed it for a period of time, would typically cause fatigue shortness of breath, chest discomfort or otherwise want you to stop. If you do not normally perform a particular activity, try to imagine what it would be like if you did.

|         |                                                                                                                                                                   |
|---------|-------------------------------------------------------------------------------------------------------------------------------------------------------------------|
| 1 MET   | Eating, getting dressed, working at a desk                                                                                                                        |
| 2 METs  | Taking a shower, shopping, cooking<br>Walking down 8 steps                                                                                                        |
| 3 METs  | Walking slowly on a flat surface for 1 or 2 blocks<br>A moderate amount of work around the house such<br>as vacuuming, sweeping the floors, or carrying groceries |
| 4 METs  | Light yard work (i.e. raking leaves, weeding, sweeping,<br>or pushing a power mower), painting, or light carpentry                                                |
| 5 METs  | Walking briskly<br>Social dancing, washing the car                                                                                                                |
| 6 METs  | Play 9 holes of golf carrying your own clubs. Heavy<br>carpentry, mow lawn with push mower                                                                        |
| 7 METs  | Carrying 60 pounds, perform heavy outdoor work<br>(i.e. digging, spading soil, etc.)                                                                              |
| 8 METs  | Carrying groceries upstairs, move heavy furniture<br>Jog slowly on flat surface, climb stairs quickly                                                             |
| 9 METs  | Bicycling at a moderate pace, sawing wood, jumping<br>rope (slowly)                                                                                               |
| 10 METs | Brisk swimming, bicycle up a hill, jog 6 miles per hour                                                                                                           |
| 11 METs | Carry a heavy load (i.e. a child or firewood) up 2<br>flights of stairs                                                                                           |
| 12 METs | Running briskly, continuously (level ground, 8 min<br>per mile)                                                                                                   |
| 13 METs | Any competitive activity, including those that involve<br>intermittent sprinting<br>Running competitively, rowing competitively, bicycle<br>riding                |

---

(Myers, Bader, Madhavan & Froelicher, 2001)
